# Supplementary material for: Protein drug target activation homogeneity in the face of intra-tumor heterogeneity: implications for precision medicine
Source: PubMed Central journal article supplement (PMC5564706; doi:10.18632/oncotarget.14019), 2016-12-15
Supplement: oncotarget-08-48534-s001.pdf [file oncotarget-08-48534-s001.pdf]

# Protein drug target activation homogeneity in the face of intra-tumor heterogeneity: implications for precision medicine

## Supplementary Material

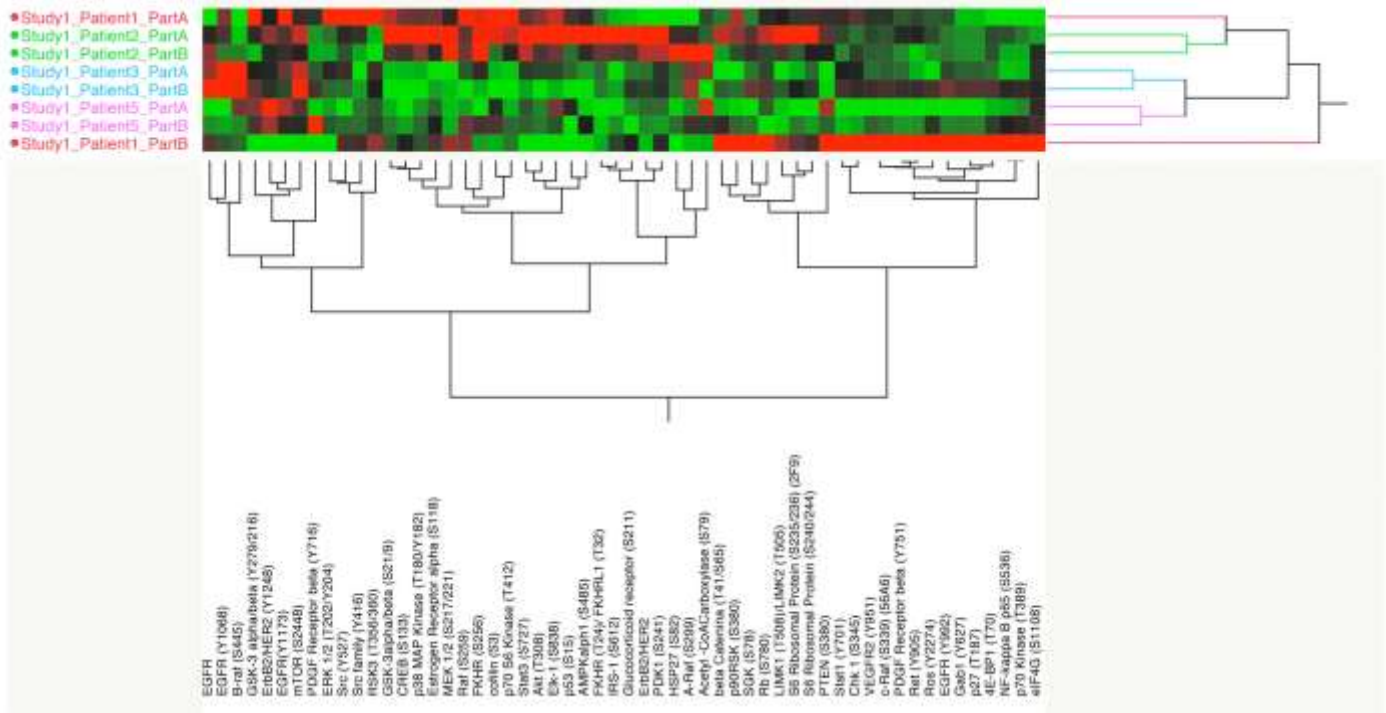

Supplementary Figure 1: Unsupervised hierarchical clustering analysis for samples included in study set 1 after two samples with overall high signaling activation were removed.

Supplementary Table 1: List of antibodies used for the analyses along with catalogue number and vendor.

For Supplementary Table 1 see in Supplementary Files.
